# Supplementary material for: Obese Asthma Phenotype Is Associated with hsa-miR-26a-1-3p and hsa-miR-376a-3p Modulating the IGF Axis
Source: MDPI journal article supplement (doi:10.3390/ijms241411620), 2023-07-18
Supplement: s1 [file s1]

**Table S1a.** Demographic, inflammatory, and clinical characteristics of the study subjects, asthmatic and control individuals (population 1; lung biopsy samples analysis).

|                                    | <b>Asthmatics<br/>(n=16)</b> | <b>Controls<br/>(n=20)</b> | <b>P-value</b> |
|------------------------------------|------------------------------|----------------------------|----------------|
| <b>Age (years)<sup>^</sup></b>     | 52.4 (± 17.7)                | 63.7 (± 8.5)               | *              |
| <b>Female (%)</b>                  | 6 (37.5%)                    | 8 (40%)                    | N.S.           |
| <b>Smoking habit (%)</b>           |                              |                            |                |
| <b>Smokers</b>                     | 4/15 (26.7%)                 | 4 (20%)                    | N.S.           |
| <b>Ex-smokers</b>                  | 7/15 (46.7%)                 | 4 (20%)                    | N.S.           |
| <b>Non-smokers</b>                 | 4/15 (26.7%)                 | 12 (40%)                   | N.S.           |
| <b>Neutrophils (%)<sup>^</sup></b> | 71.4 % (± 16.2)              | 80.6 % (± 6.1)             | N.S.           |
| <b>Lymphocytes (%)<sup>^</sup></b> | 18.2 % (± 12.7)              | 10.7 % (± 3.9)             | N.S.           |
| <b>Monocytes (%)<sup>^</sup></b>   | 8.4 % (± 2.9)                | 7.7 % (± 2.6)              | N.S.           |
| <b>Eosinophils (%)<sup>^</sup></b> | 1.6 % (± 1.9)                | 0.8 % (± 0.8)              | N.S.           |
| <b>Basophils (%)<sup>†</sup></b>   | 0.3 % (0.1-0.5)              | 0.2 % (0.1-0.4)            | N.S.           |
| <b>Atopy (%)</b>                   | 3 (18.8%)                    | 0/18 (0%)                  | N.S.           |

Results are expressed as <sup>^</sup>Mean (± SD) or <sup>†</sup>median (IQR); N.S., Non-significant; \*,  $p < 0.05$ .

**Table S1b.** Demographic, inflammatory, functional, and clinical characteristics of obese and non-obese asthmatic patients (population 2; serum samples analysis).

|                                                 | <b>Obese<br/>(n=26)</b> | <b>Non-obese<br/>(n=51)</b> | <b>P-value</b> |
|-------------------------------------------------|-------------------------|-----------------------------|----------------|
| <b>Age (years)<sup>^</sup></b>                  | 52.5 (±10.7)            | 46.7 (±15.5)                | N.S.           |
| <b>Female (%)</b>                               | 19 (73.1%)              | 35 (68.6%)                  | N.S.           |
| <b>BMI<sup>†</sup></b>                          | 33 (31.6-36.4)          | 23.8 (22.2-26.5)            | ****           |
| <b>Obesity (%)</b>                              | 26 (100%)               | 0 (0%)                      | ****           |
| <b>Tobacco habit (%)</b>                        |                         |                             |                |
| <b>Smokers</b>                                  | 0/25 (0%)               | 3/47 (6.4%)                 | N.S.           |
| <b>Passive</b>                                  | 2/25 (8%)               | 4/47 (8.5%)                 | N.S.           |
| <b>Ex-smokers</b>                               | 10/25 (40%)             | 15/47 (31.9%)               | N.S.           |
| <b>Non-smokers</b>                              | 13/25 (52%)             | 25/47 (53.2%)               | N.S.           |
| <b>Blood eosinophils (cells/μL)<sup>†</sup></b> | 200 (115-525)           | 500 (100-700)               | N.S.           |
| <b>Sputum eosinophils (%)<sup>†</sup></b>       | 4% (0-12)               | 2% (0-11.8)                 | N.S.           |
| <b>Atopy (%)</b>                                | 20 (76.9%)              | 33 (64.7%)                  | N.S.           |
| <b>IgE (IU)<sup>†</sup></b>                     | 180.5 (65.3-460.8)      | 178 (62.9-401.5)            | N.S.           |
| <b>FEV<sub>1</sub>/FVC (%)<sup>^</sup></b>      | 86.5% (±14.6)           | 78.8% (±13.5)               | *              |
| <b>FeNO (ppb)<sup>†</sup></b>                   | 24 (14.5-36.5)          | 33.5 (15.8-68)              | N.S.           |
| <b>Exacerbations (%)</b>                        | 13 (50%)                | 26 (51%)                    | N.S.           |
| <b>Severity (%)</b>                             |                         |                             |                |
| <b>Severe</b>                                   | 8/25 (32%)              | 25/44 (56.8%)               | *              |
| <b>Moderate</b>                                 | 11/25 (44%)             | 9/44 (20.5%)                | *              |
| <b>Mild</b>                                     | 6/25 (24%)              | 9/44 (20.5%)                | N.S.           |
| <b>Intermittent</b>                             | 0/25 (0%)               | 1/44 (2.3%)                 | N.S.           |
| <b>ACT<sup>†</sup></b>                          | 21 (16.5-22)            | 21 (17-24)                  | N.S.           |
| <b>ICS and LABA (%)</b>                         | 25 (96.2%)              | 44 (86.3%)                  | N.S.           |
| <b>Late asthma onset</b>                        | 17/24 (70.8%)           | 34/43 (79.1%)               | N.S.           |

Results are expressed as <sup>^</sup>mean (±SD) or <sup>†</sup>median (IQR); N.S., Non-significant; \*\*\*\*,  $p<0.0001$ ; \*,  $p<0.05$ ; BMI, Body Mass Index; FEV<sub>1</sub>, Forced Expiratory Volume measured during the first second; FVC, Forced Vital Capacity; FeNO, Fractional exhaled Nitric Oxide; Ppb, parts per billion; ICS and LABA, Inhaled Corticosteroids and Long-Acting  $\beta$ 2-Agonists; ACT, Asthma Control Test.
